# Supplementary material for: Bacterial and Eukaryotic Small-Subunit Amplicon Data Do Not Provide a Quantitative Picture of Microbial Communities, but They Are Reliable in the Context of Ecological Interpretations
Source: PubMed Central journal article supplement (PMC7056804; doi:10.1128/msphere.00052-20), 2020-03-04

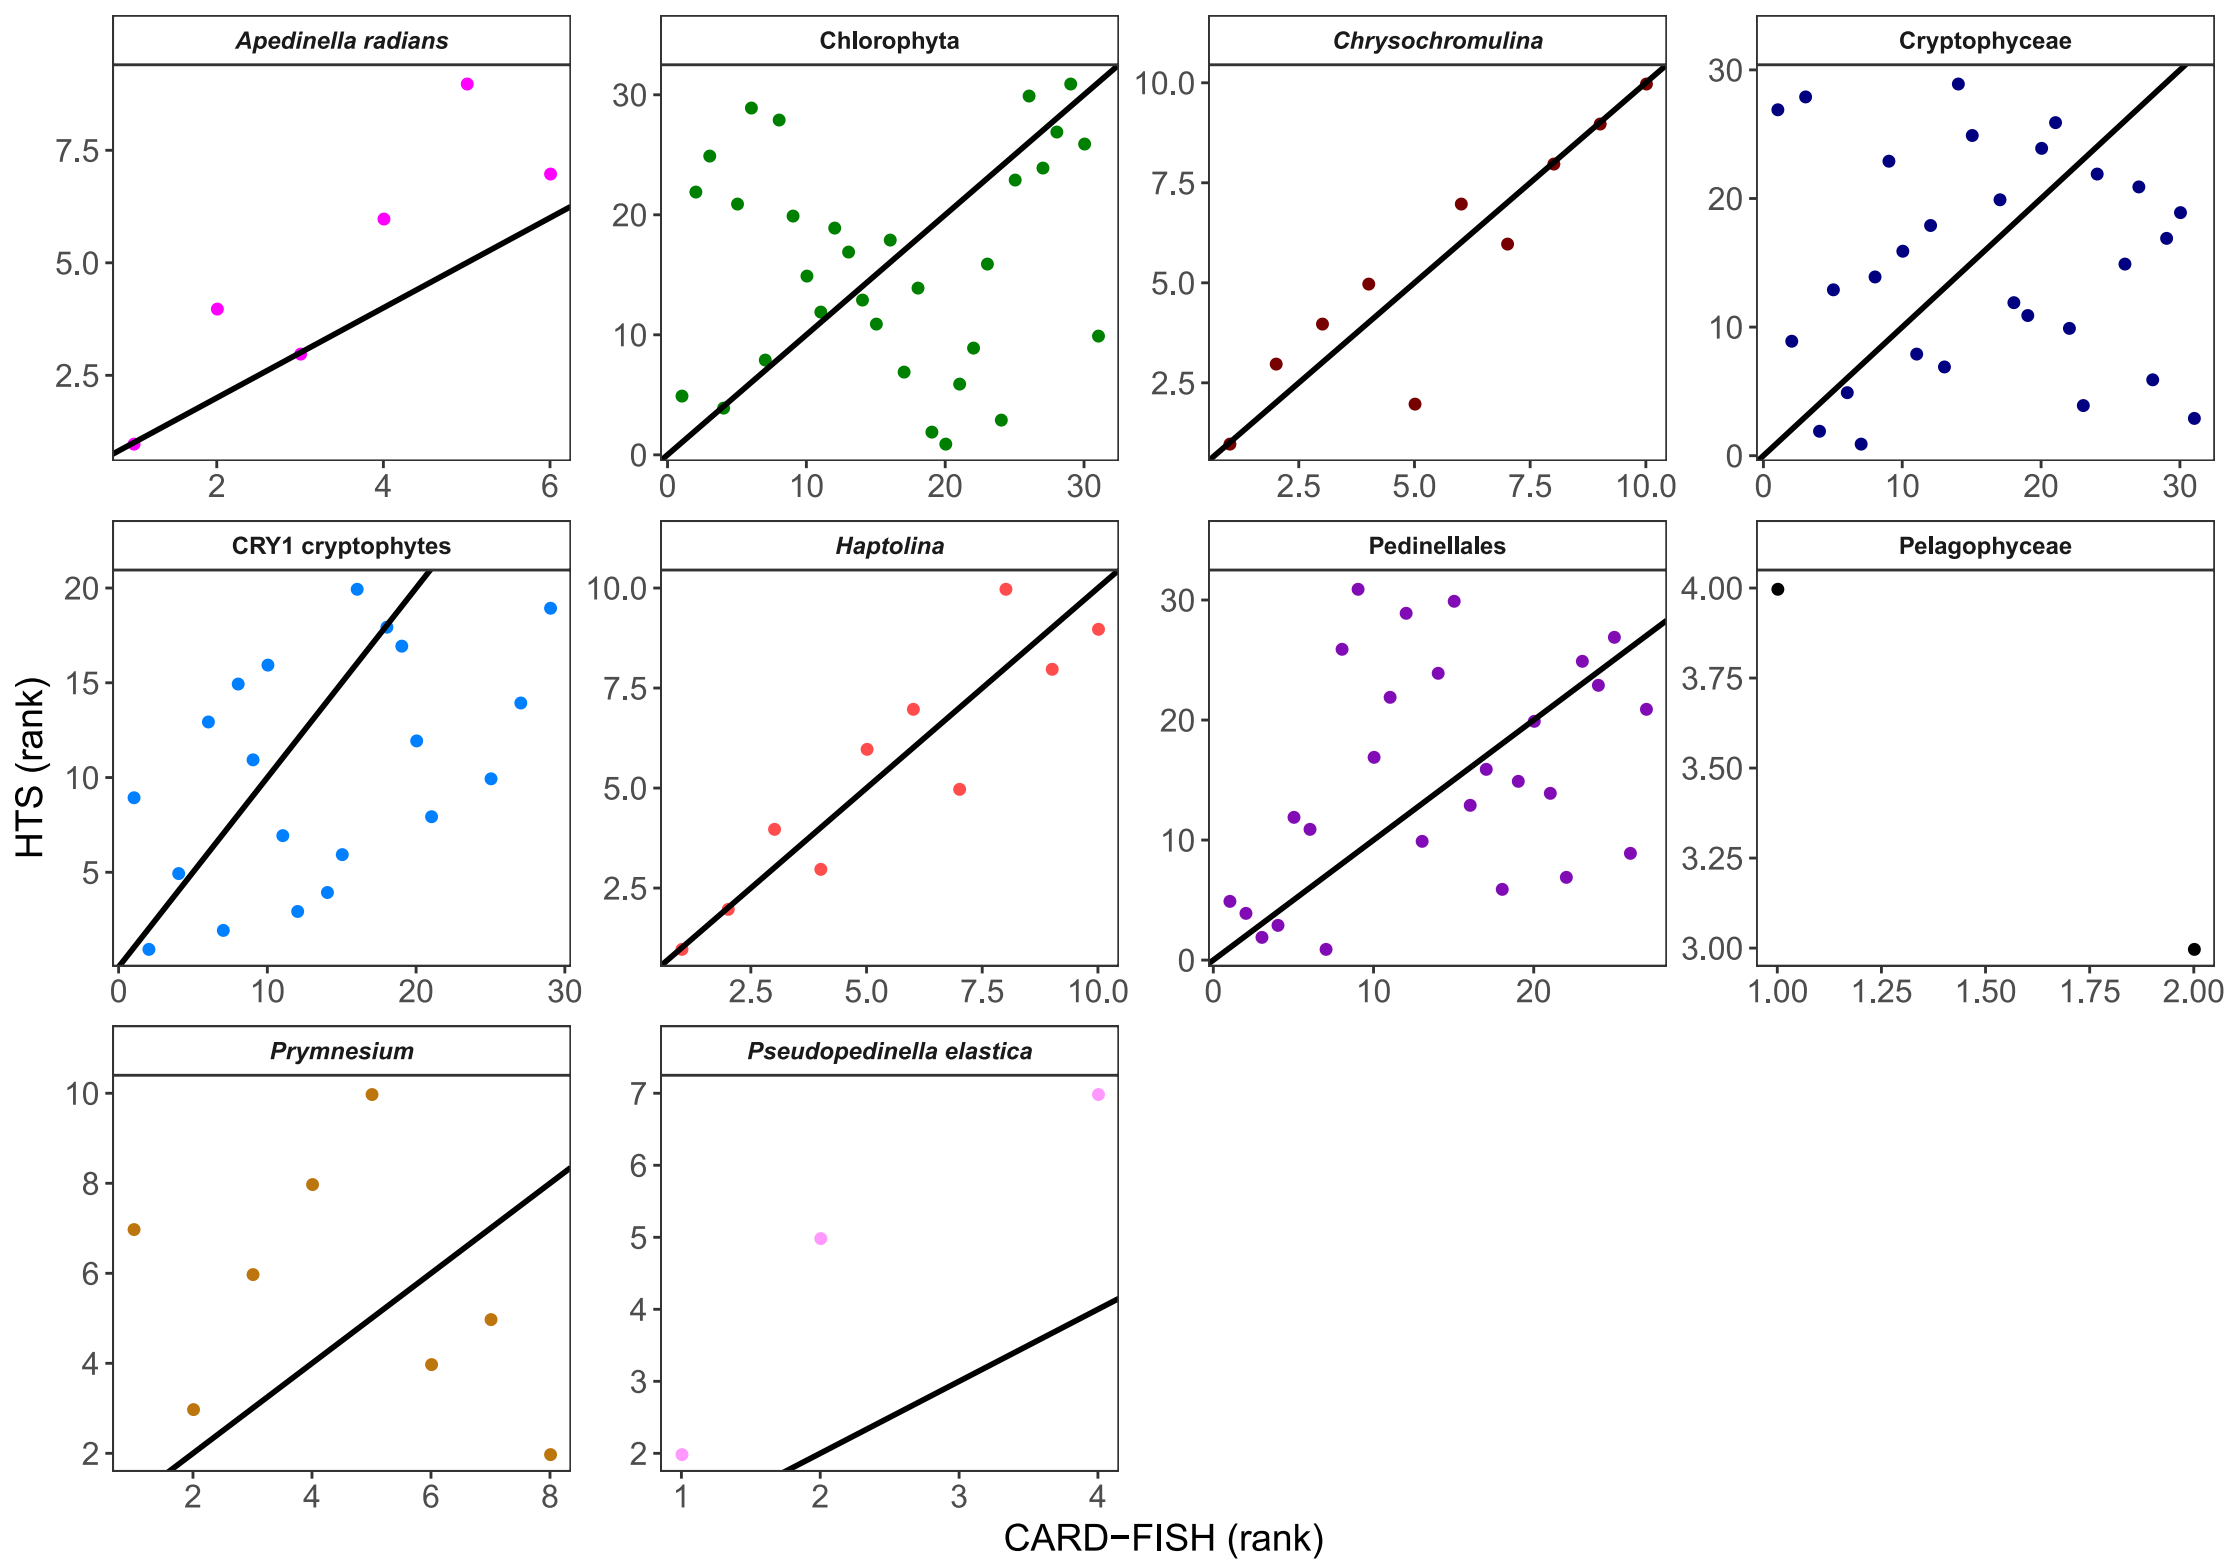

Supplement: mSphere.00052-20-sf004.pdf [file mSphere.00052-20-sf004.pdf]
