# Supplementary material for: Bacterial and Eukaryotic Small-Subunit Amplicon Data Do Not Provide a Quantitative Picture of Microbial Communities, but They Are Reliable in the Context of Ecological Interpretations
Source: PubMed Central journal article supplement (PMC7056804; doi:10.1128/msphere.00052-20), 2020-03-04
Supplement: mSphere.00052-20-st001.pdf [file mSphere.00052-20-st001.pdf]

**Supplementary Table 1.** List of primers used in this study.

| Primer                       | Target group   | Sequence (5' → 3')         | Reference            |
|------------------------------|----------------|----------------------------|----------------------|
| TAREuk454FWD1 <sup>FWD</sup> | All eukaryotes | CCA GCA SCY GCG GTA ATT CC | Stoeck et al. (2010) |
| TAREukREV3 <sup>REV</sup>    | All eukaryotes | ACT TTC GTT CTT GAT YRA    | Stoeck et al. (2010) |
| HaptoR1 <sup>REV</sup>       | Haptophyta     | CGA AAC CAA CAA AAT AGC AC | Egge et al. (2013)   |
| 341F <sup>FWD</sup>          | Bacteria       | CCT ACG GGA GGC AGC AG     | Muyzer et al. (1993) |
| 907R <sup>REV</sup>          | Bacteria       | CCG TCA ATT CMT TTG AGT TT | Lane et al. (1985)   |
| 27F <sup>FWD</sup>           | Bacteria       | AGR GTT YGA TYM TGG CTC AG | Alm et. al (1996)    |
| Uni522R <sup>REV</sup>       | Bacteria       | GWA TTA CCG CGG CKG CTG    | Alm et. al (1996)    |

<sup>FWD</sup> – forward primer, <sup>REV</sup> – reverse primer

#### References

- Alm, E. W., Oerther, D. B., Larsen, N., Stahl, D. A., Raskin, L. (1996). The oligonucleotide probe database. *Appl Environ Microbiol* 62: 3557-3559.
- Egge, E., Bittner, L., Andersen, T., Audic, S., de Vargas, C., and Edvardsen, B. (2013) 454 Pyrosequencing to Describe Microbial Eukaryotic Community Composition, Diversity and
- Lane, D.J., Pace, B., Olsen, G.J., Stahl, D.A., Sogin, M.L., and Pace, N.R. (1985) Rapid determination of 16S ribosomal RNA sequences for phylogenetic analyses. *Proceedings of the National Academy of Sciences of the United States of America* **82**: 6955-6959.
- Muyzer, G., Dewaal, E.C., and Uitterlinden, A.G. (1993) Profiling of complex microbial populations by denaturing gradient gel-electrophoresis analysis of polymerase chain reaction-amplified genes-coding for 16S ribosomal-rRNA. *Applied and Environmental Microbiology* **59**: 695-700.
- Stoeck, T., Bass, D., Nebel, M., Christen, R., Jones, M.D.M., Breiner, H.-W., and Richards, T.A. (2010) Multiple marker parallel tag environmental DNA sequencing reveals a highly complex eukaryotic community in marine anoxic water. *Molecular Ecology* **19**: 21-31.
